# Supplementary material for: Application of Magnetic Materials Combined with Echo® Mass Spectrometry System in Analysis of Illegal Drugs in Sewage
Source: MDPI journal article supplement (doi:10.3390/molecules29092060), 2024-04-29
Supplement: s1 [file s1]

# Application of magnetic materials combined with Echo<sup>®</sup> MS system in ultra-fast and ultra-sensitive detection of illegal drugs in sewage

Feiyu Yang<sup>1\*</sup>, Kaijun Ma<sup>2</sup>, Yichao Cao <sup>1</sup>and Zhiyuan Li<sup>3</sup>

<sup>1</sup> Shanghai Research Institute of Criminal Science and Technology, Shanghai Key Laboratory of Crime Scene Evidence, Shanghai 200083, China; yccaosh@139.com

<sup>2</sup> Shanghai Institute of Forensic Science, Shanghai Key Laboratory of Crime Scene Evidence, Shanghai 200083, China; makaijun@sina.cn

<sup>3</sup> Shanghai AB Sciex Analytical Instrument Trading Co., Ltd., Beijing 100015, China; zhiyuan.li@sciex.com

\* Correspondence: yangfyhit@sina.com

## Amphetamine

Calibration for AM-1:  $y = 0.00200x + -8.92197e-4$  ( $r = 0.99984$ ,  $r^2 = 0.99968$ ) (weighting:  $1/x$ )

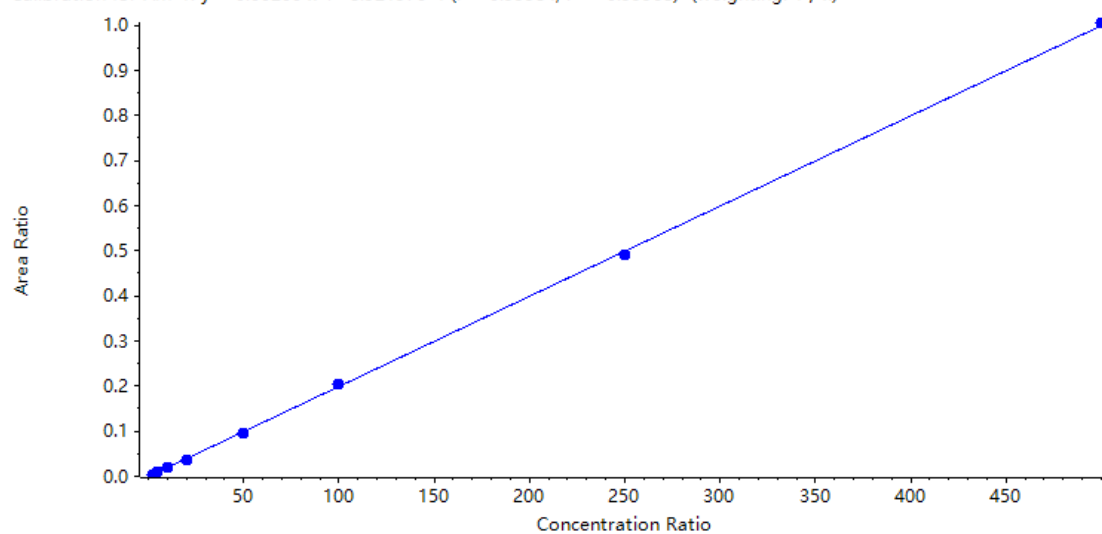

**Figure S1.** Calibration graph of Amphetamine

Calibration for MA-1:  $y = 0.00625x + 0.00113$  ( $r = 0.99801$ ,  $r^2 = 0.99603$ ) (weighting:  $1/x^2$ )

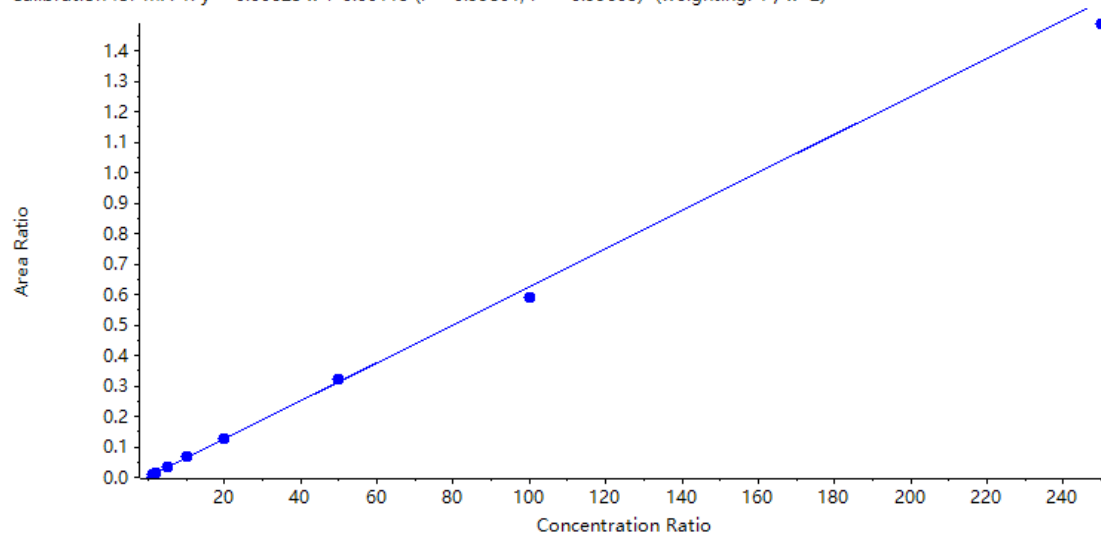

**Figure S2.** Calibration graph of Methamphetamine

Calibration for O6-1:  $y = 0.00463x + 3.36531e-4$  ( $r = 0.99913$ ,  $r^2 = 0.99827$ ) (weighting:  $1/x^2$ )

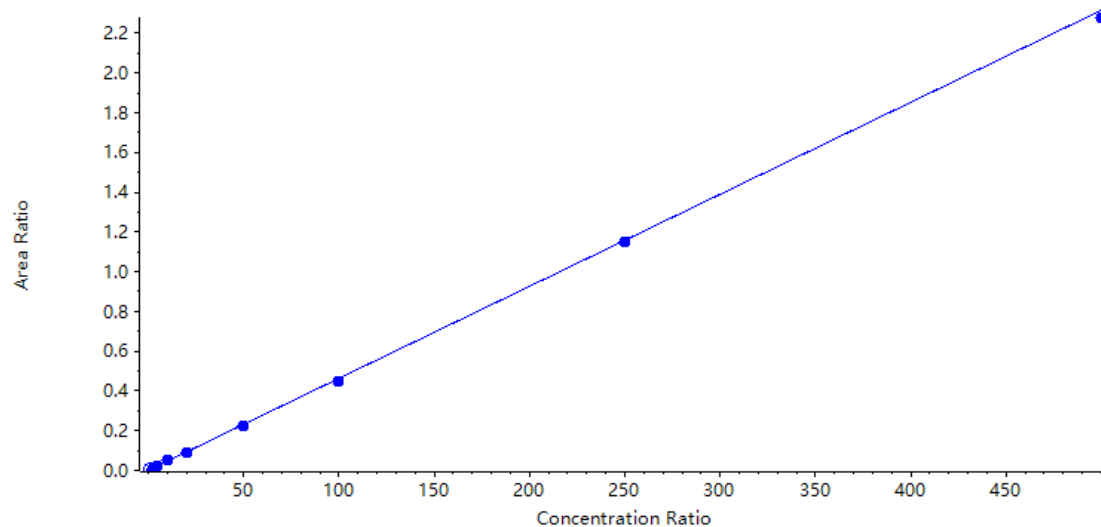

**Figure S3.** Calibration graph of O6-monoacetylmorphine

Calibration for Mor-1:  $y = 0.00218x + 1.56023e-4$  ( $r = 0.99754$ ,  $r^2 = 0.99509$ ) (weighting:  $1/x^2$ )

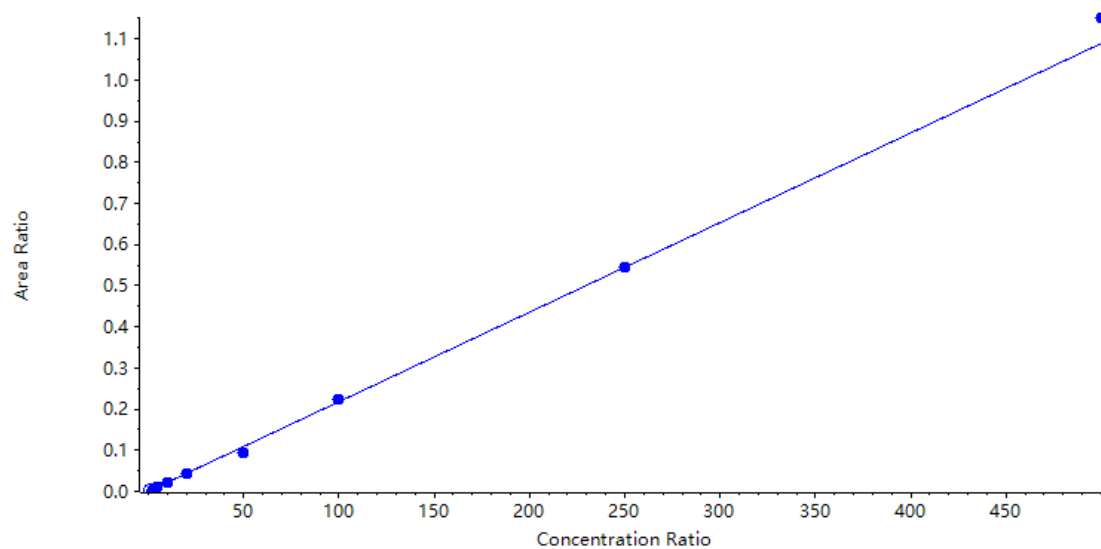

**Figure S4.** Calibration graph of Morphine

Calibration for K-1:  $y = 0.00318x + 0.00102$  ( $r = 0.99886$ ,  $r^2 = 0.99772$ ) (weighting:  $1/x^2$ )

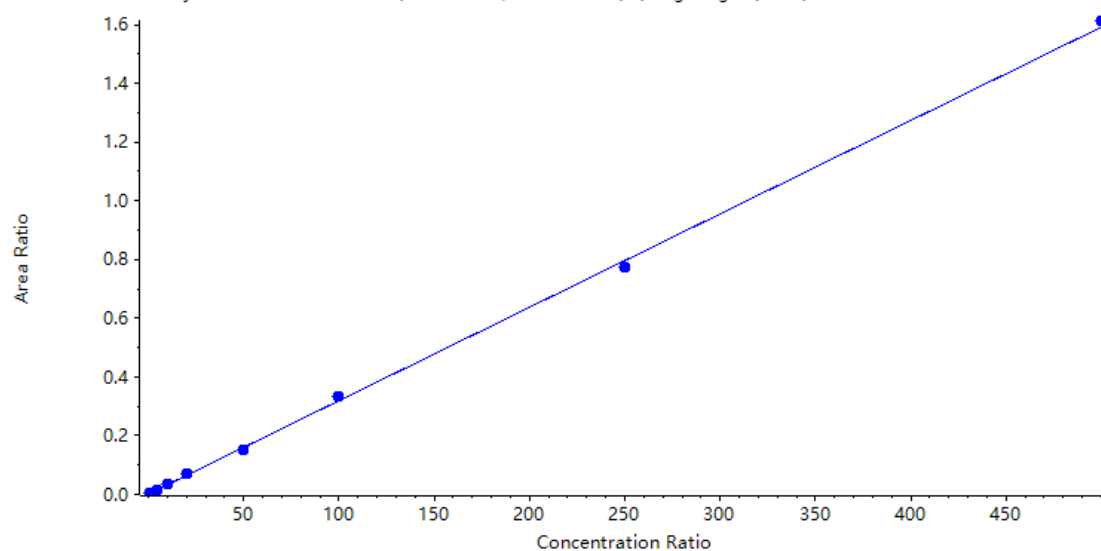

**Figure S5.** Calibration graph of Ketamine

Calibration for NK-1:  $y = 0.00256x + 0.00136$  ( $r = 0.99796$ ,  $r^2 = 0.99593$ ) (weighting:  $1/x^2$ )

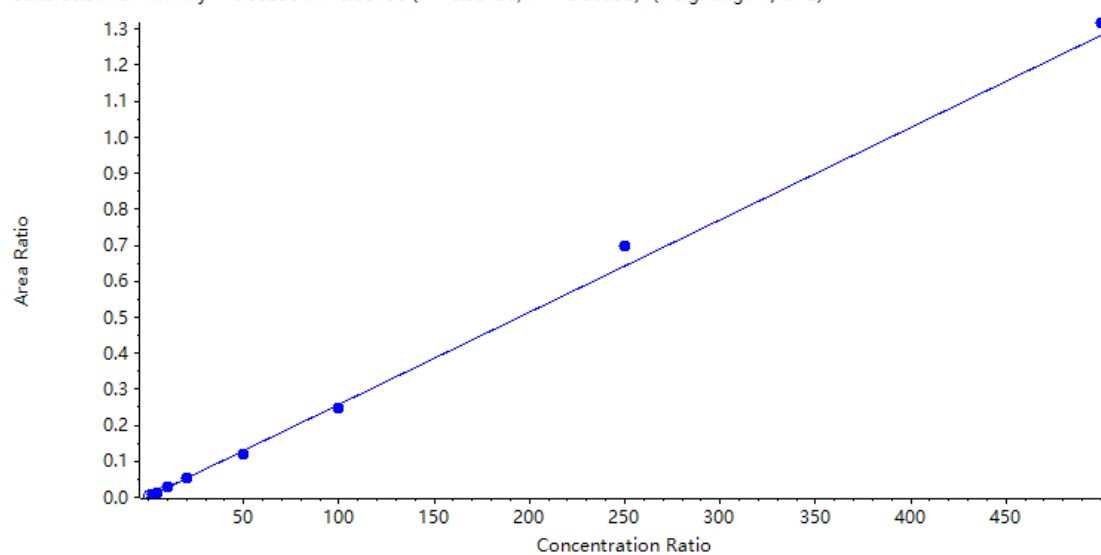

**Figure S6.** Calibration graph of Norketamine

Calibration for Coc-1:  $y = 0.00721x + 0.00269$  ( $r = 0.99847$ ,  $r^2 = 0.99694$ ) (weighting:  $1/x^2$ )

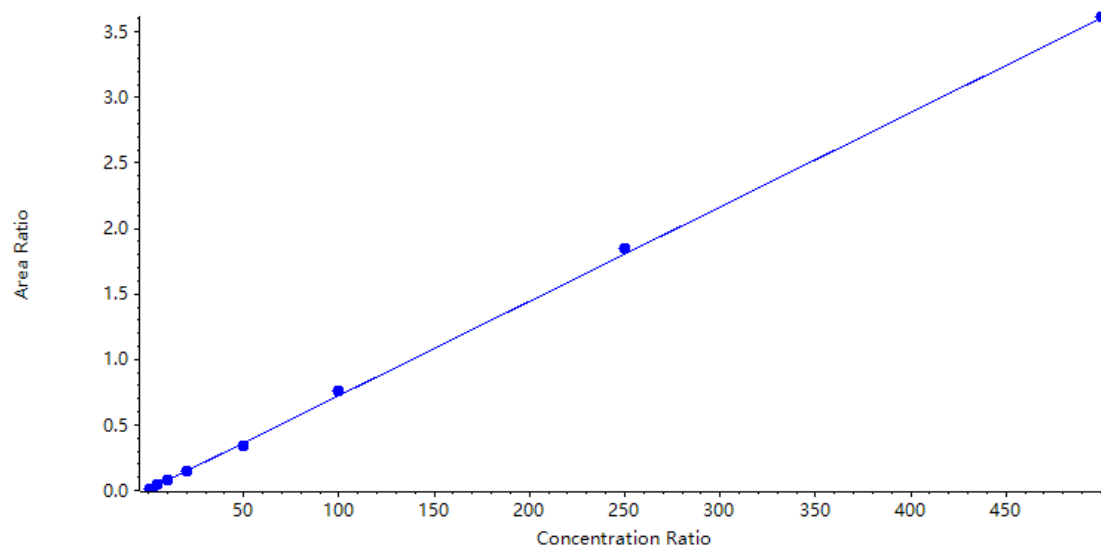

**Figure S7.** Calibration graph of Benzoylecgonine

Calibration for BZE-1:  $y = 0.00299x + 0.00105$  ( $r = 0.99750$ ,  $r^2 = 0.99501$ ) (weighting:  $1/x^2$ )

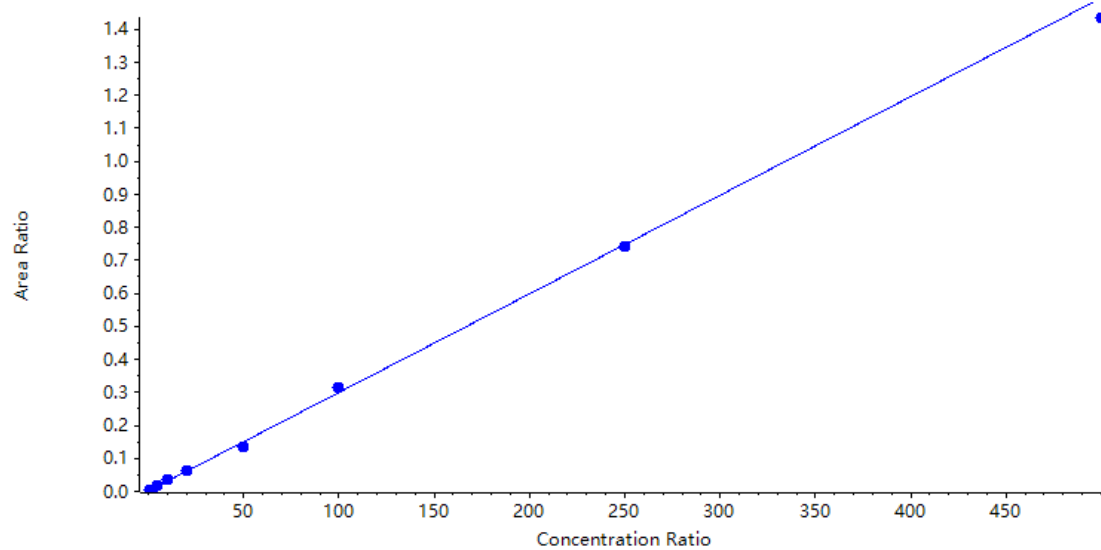

**Figure S8.** Calibration graph of Benzoylecgonine

Calibration for MDA-1:  $y = 0.04854x + -0.00804$  ( $r = 0.99976$ ,  $r^2 = 0.99952$ ) (weighting:  $1 / x^2$ )

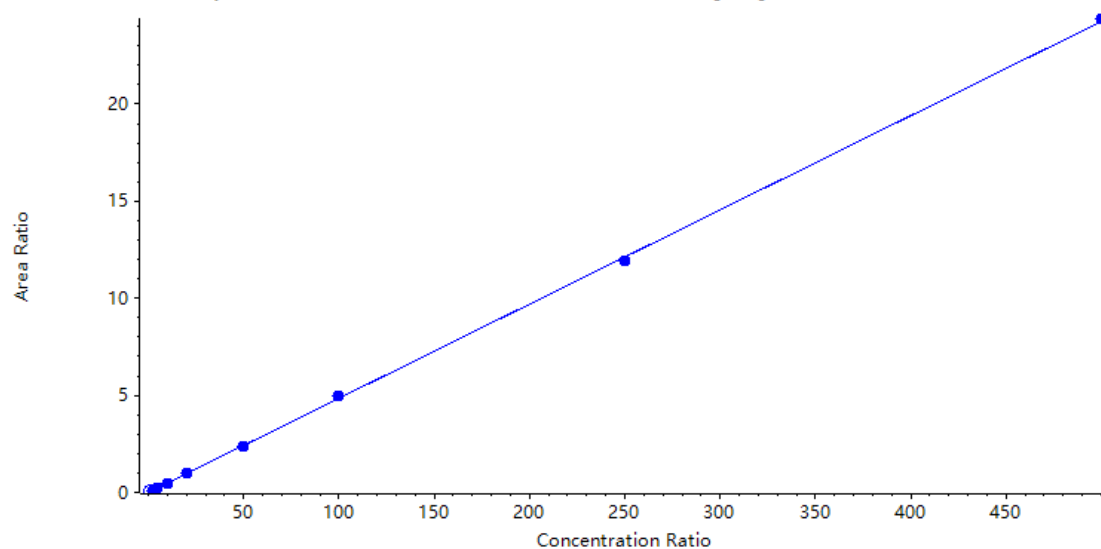

**Figure S9.** Calibration graph of 3,4-Methylenedioxyamphetamine, MDA

Calibration for MDMA-1:  $y = 0.00244x + -5.97610e-4$  ( $r = 0.99761$ ,  $r^2 = 0.99522$ ) (weighting:  $1 / x^2$ )

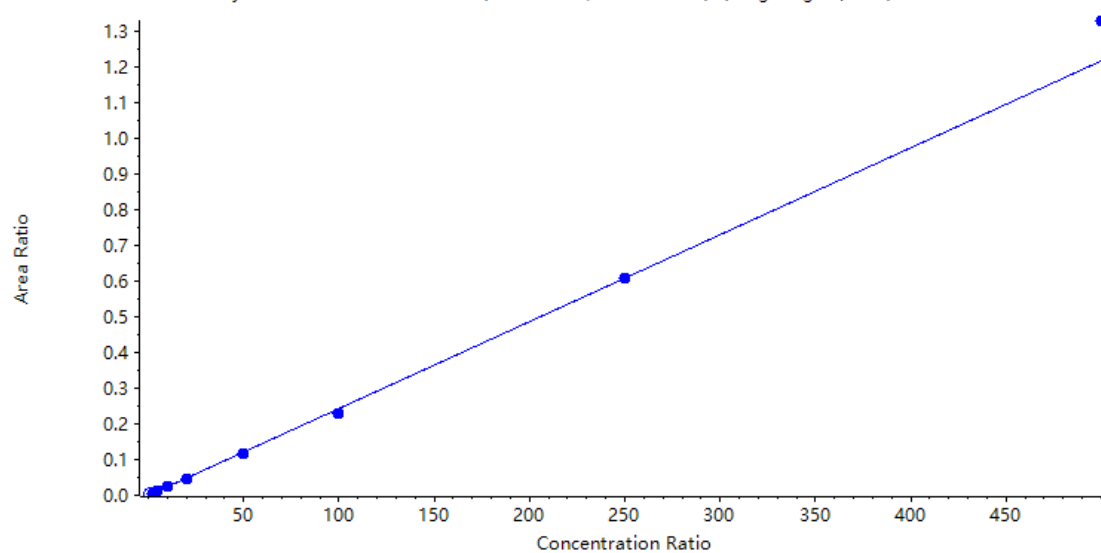

**Figure S10.** Calibration graph of MDMA

Calibration for Cathinone-1:  $y = 0.00341x + 0.00402$  ( $r = 0.99775$ ,  $r^2 = 0.99550$ ) (weighting:  $1/x^2$ )

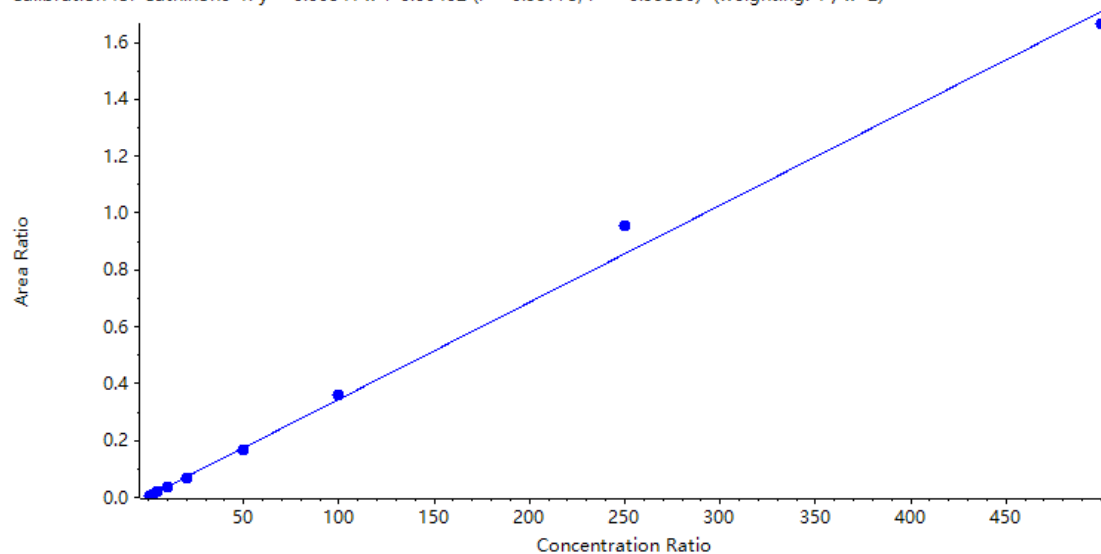

**Figure S11.** Calibration graph of Cathinone

Calibration for MC-1:  $y = 0.00162x + -0.00110$  ( $r = 0.99631$ ,  $r^2 = 0.99264$ ) (weighting:  $1/x^2$ )

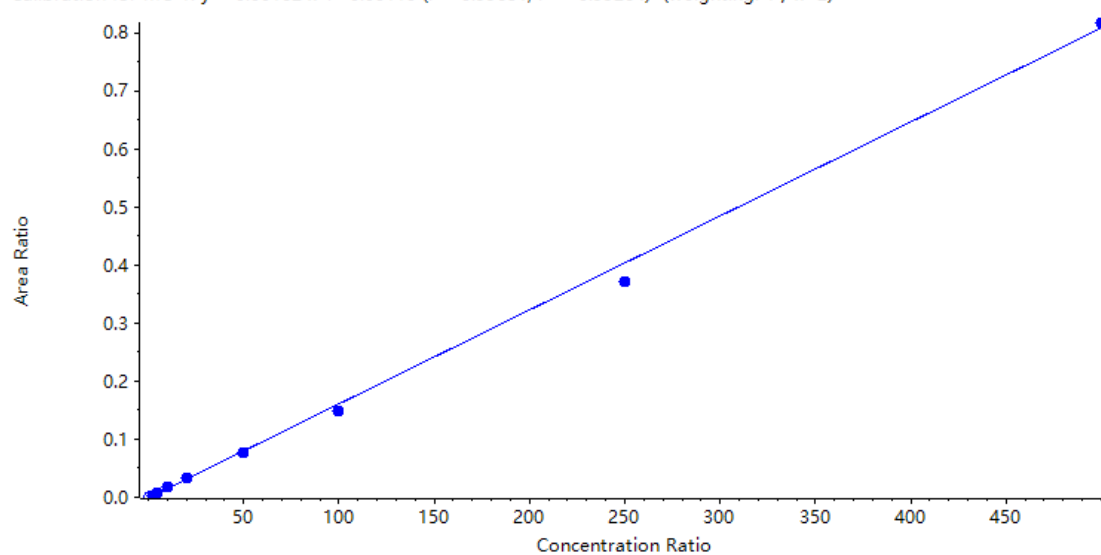

**Figure S12.** Calibration graph of Methcathinone

Calibration for Fentanyl-1:  $y = 0.00608x - 0.00142$  ( $r = 0.99955$ ,  $r^2 = 0.99910$ ) (weighting:  $1/x^2$ )

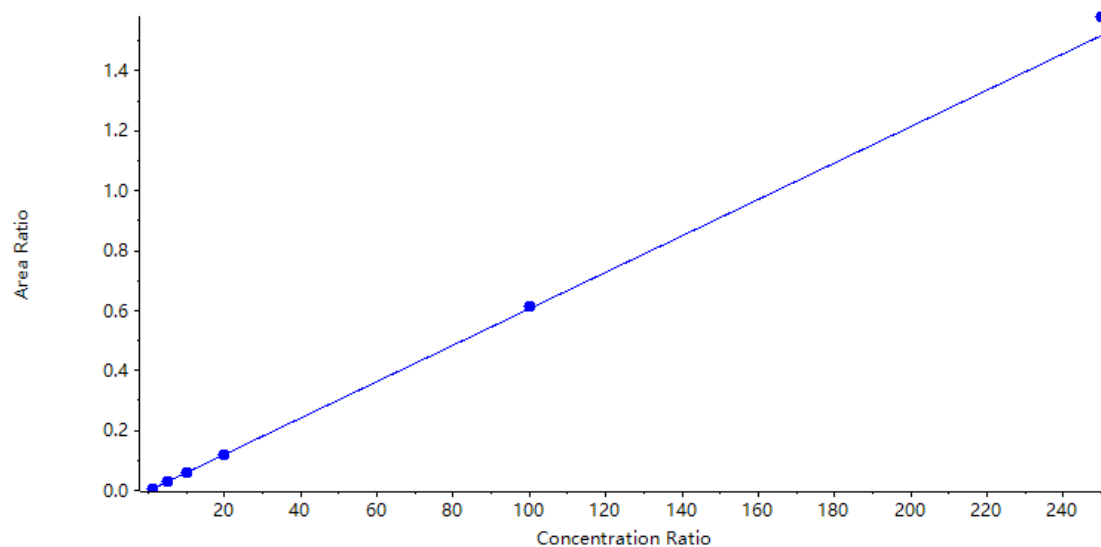

**Figure S13.** Calibration graph of Fentanyl

Calibration for diazepam 1:  $y = 0.00313x + 0.00316$  ( $r = 0.99911$ ,  $r^2 = 0.99822$ ) (weighting:  $1/x^2$ )

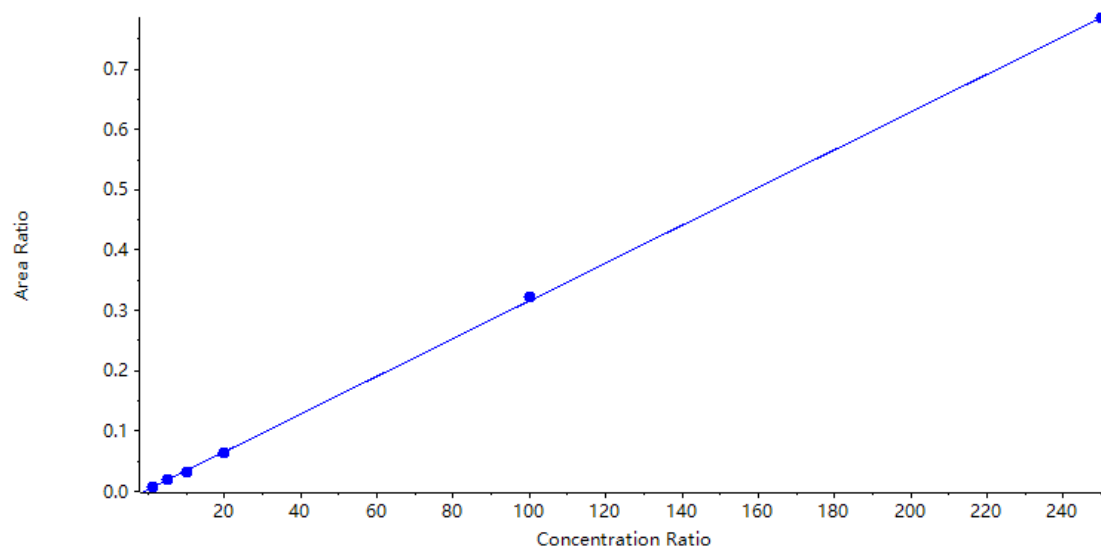

**Figure S14.** Calibration graph of Diazepam



Calibration for Estazolam 1:  $y = 0.00394x + 5.11284 \times 10^{-4}$  ( $r = 0.99873$ ,  $r^2 = 0.99747$ ) (weighting:  $1/x^2$ )

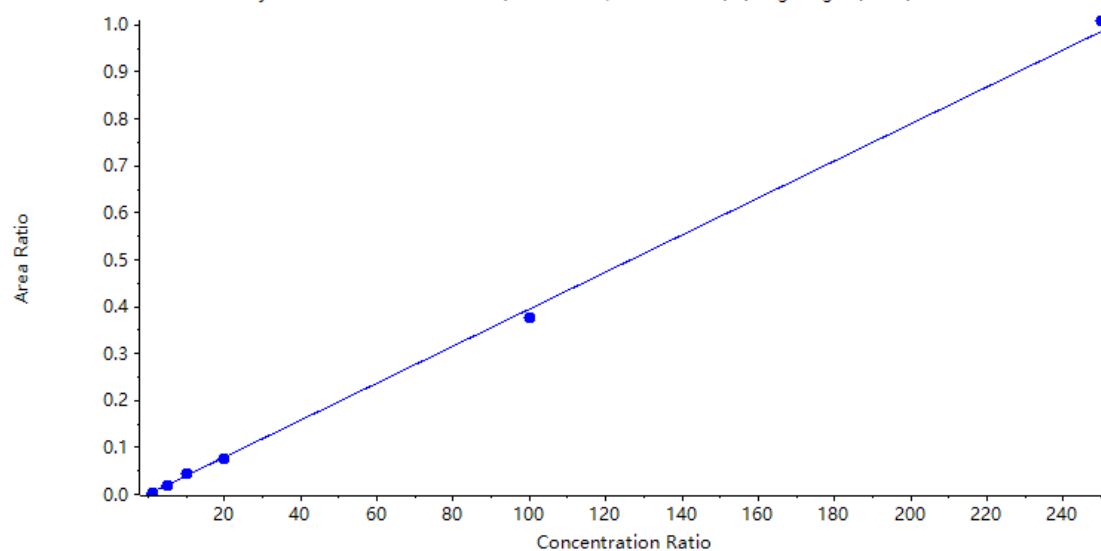

**Figure S15.** Calibration graph of Estazolam

Calibration for Methadone-1:  $y = 0.00664x + 0.00565$  ( $r = 0.99715$ ,  $r^2 = 0.99431$ ) (weighting:  $1/x^2$ )

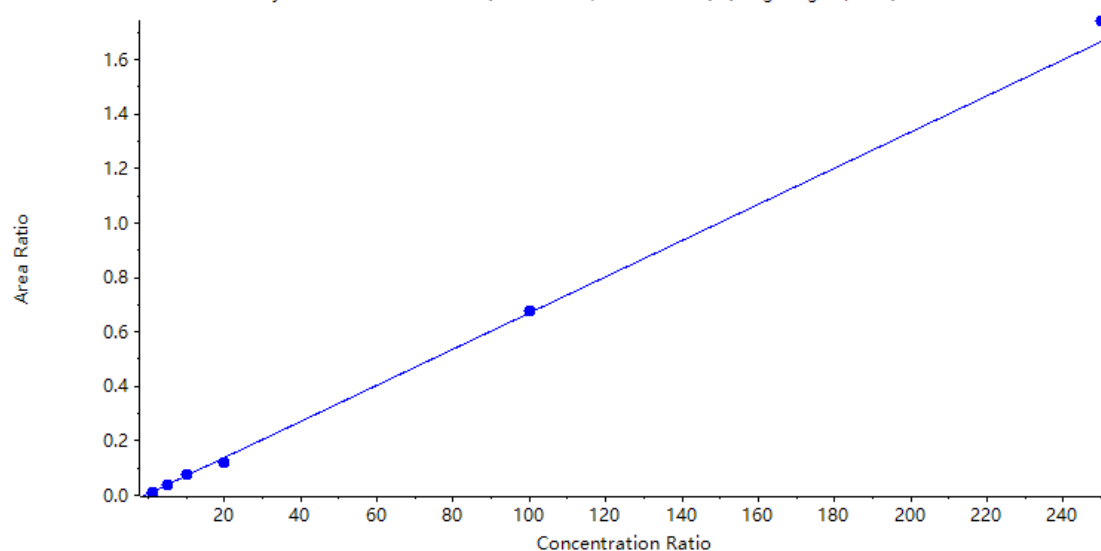

**Figure S16.** Calibration graph of Methadone

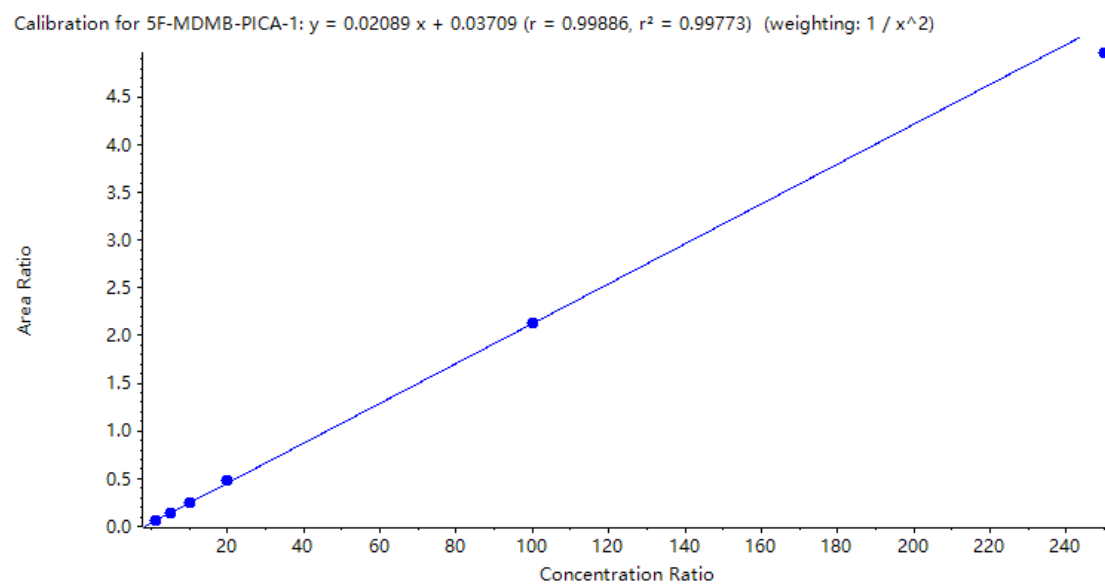

**Figure S17.** Calibration graph of  
N-(1-methoxy-3,3-dimethyl-1-oxobutan-2-yl)-1-(5-fluoropentyl)-1H-indole-3-carboxamide

Table S1 The purity of each standard (native and mass-labelled)

| No. | Drugs                                                                                               | Purity   |
|-----|-----------------------------------------------------------------------------------------------------|----------|
| 1   | amphetamine                                                                                         | 100ug/mL |
|     | amphetamine-D5                                                                                      | 100ug/mL |
| 2   | methamphetamine                                                                                     | 100ug/mL |
|     | methamphetamine-D5                                                                                  | 100ug/mL |
| 3   | O <sup>6</sup> -monoacetylmorphine                                                                  | 100ug/mL |
|     | O <sup>6</sup> -monoacetylmorphine-D3                                                               | 100ug/mL |
| 4   | morphine                                                                                            | 100ug/mL |
|     | morphine-D3                                                                                         | 100ug/mL |
| 5   | ketamine                                                                                            | 100ug/mL |
|     | ketamine-D4                                                                                         | 100ug/mL |
| 6   | Norketamine                                                                                         | 100ug/mL |
|     | Norketamine-D4                                                                                      | 100ug/mL |
| 7   | Cocaine                                                                                             | 100ug/mL |
|     | Cocaine-D3                                                                                          | 100ug/mL |
| 8   | Benzoylecgonine                                                                                     | 100ug/mL |
|     | Benzoylecgonine-D3                                                                                  | 100ug/mL |
| 9   | 3,4-Methylenedioxyamphetamine                                                                       | 100ug/mL |
|     | 3,4-Methylenedioxyamphetamine-D4                                                                    | 100ug/mL |
|     | 3,4-methylenedioxymethamphetamine                                                                   | 100ug/mL |
| 10  | 3,4-methylenedioxymethamphetamine-D4                                                                | 100ug/mL |
| 11  | Cathinone                                                                                           | 100ug/mL |
|     | Cathinone-D5                                                                                        | 100ug/mL |
| 12  | Methcathinone                                                                                       | 100ug/mL |
|     | Methcathinone-D5                                                                                    | 100ug/mL |
| 13  | Fentanyl                                                                                            | 100ug/mL |
|     | Fentanyl-D5                                                                                         | 100ug/mL |
| 14  | Diazepam                                                                                            | 100ug/mL |
|     | Diazepam-D5                                                                                         | 100ug/mL |
| 15  | Estazolam                                                                                           | 100ug/mL |
|     | Estazolam-D5                                                                                        | 100ug/mL |
| 16  | methadone                                                                                           | 100ug/mL |
|     | methadone-D10                                                                                       | 100ug/mL |
| 17  | N-(1-methoxy-3,3-dimethyl-1-oxobutan-2-yl)-1-(5-fluoropentyl)-1H-indole-3-carboxamide(5F-MDMB-PICA) | 100ug/mL |
|     | N-(1-methoxy-3,3-dimethyl-1-oxobutan-2-yl)-1-(5-fluoropentyl)-1H-indole-3-carboxamide-D4            | 100ug/mL |
|     |                                                                                                     |          |
